# Supplementary material
Source: MDPI journal article supplement (https://www.mdpi.com/2297-8739/9/2/35)
Supplement: s1 [file s1]

**Table S1.** Maximum Residue Limits ( $\mu\text{g}\cdot\text{kg}^{-1}$ ) of antibiotics in aquaculture products in various countries

| Classes Of Antibiotics | Compounds         | CAS         | Molecular Weight | LogP | EU  | China            | CAC |
|------------------------|-------------------|-------------|------------------|------|-----|------------------|-----|
| Aminoglycosides        | Neomycin sulfate  | 1404-04-2   | 908.879          | -3.7 | 500 | 500              | /   |
|                        | Spectinomycin     | 1695-77-8   | 332.350          | 1.3  | 300 | /                | /   |
|                        | Kanamycin         | 8063-07-8   | 484.499          | -2.6 | 100 | /                | /   |
| Macrolides             | Erythromycin      | 114-07-8    | 733.927          | 2.8  | 200 | 200              | /   |
|                        | Tylosin           | 1401-69-0   | 916.100          | 3.3  | 100 | /                | /   |
|                        | Tilmicosin        | 108050-54-0 | 869.133          | 5.0  | 50  | /                | /   |
| Lincomycins            | Lincomycin        | 154-21-2    | 442.998          | 0.9  | 100 | 100              | /   |
| Quinolones             | Flumequine        | 42835-25-6  | 261.248          | 2.4  | 600 | 500              | 500 |
|                        | Sarafloxacin      | 98105-99-8  | 385.364          | 2.1  | 30  | 30               | /   |
|                        | Danofloxacin      | 112398-08-0 | 357.379          | 1.2  | 100 | 100              | /   |
|                        | Oxolinic acid     | 14698-29-4  | 261.23           | 1.4  | 100 | 100              | /   |
|                        | Enrofloxacin      | 93106-60-6  | 359.395          | 1.9  | 100 | 100              | /   |
|                        | Lomefloxacin      | 98079-51-7  | 387.809          | 1.7  | /   |                  | /   |
|                        | Pefloxacin        | 70458-92-3  | 333.357          | 1.5  | /   | F                | /   |
|                        | Ofloxacin         | 82419-36-1  | 361.368          | 0.8  | /   |                  | /   |
|                        | Norfloxacin       | 70458-96-7  | 319.331          | 0.8  | /   |                  | /   |
| Tetracyclines          | Oxytetracycline   | 79-57-2     | 460.434          | -1.5 | 100 |                  | 200 |
|                        | Chlortetracycline | 57-62-5     | 478.88           | -0.5 | 100 | 200 <sup>T</sup> | /   |
|                        | Tetracycline      | 60-54-8     | 444.435          | -0.6 | 100 |                  | /   |
|                        | Doxycycline       | 564-25-0    | 444.435          | -0.5 | /   | 100              | /   |

|                 |                      |            |         |      |                    |                  |    |
|-----------------|----------------------|------------|---------|------|--------------------|------------------|----|
| Sulfonamides    | /                    | /          | /       | /    | 100 <sup>T</sup>   | 100 <sup>T</sup> | /  |
| Beta-lactam     | Amoxicillin          | 26787-78-0 | 365.404 | 0.6  | 50                 | 50               | 50 |
|                 | Ampicillin           | 69-53-4    | 349.405 | 1.3  | 50                 | 50               | 50 |
|                 | Benzylpenicillin     | 61-33-6    | 334.39  | 1.7  | 50                 | 50               | /  |
|                 | Cloxacillin          | 61-72-3    | 435.881 | 2.5  | 300                | 300              | /  |
|                 | Oxacillin            | 66-79-5    | 401.436 | 2.1  | 300                | 300              | /  |
|                 | Penethacillin        | 3689-73-4  | 433.564 | /    | 50                 | /                | /  |
| Amphenicols     | Chloramphenicol      | 56-75-7    | 323.129 | 1.0  | F,0.3 <sup>a</sup> | F                | R  |
|                 | Thiamphenicol        | 15318-45-3 | 356.222 | -0.3 | 50                 | 50               | /  |
|                 | Florfenicol          | 76639-94-6 | 358.213 | -0.1 | 1000               | 1000             | /  |
| Nitrofurans     | Nitrofurazone        | 59-87-0    | 198.136 | -0.4 | F,1 <sup>a</sup>   | F                | R  |
|                 | Nitrofurantoin       | 67-20-9    | 238.157 | -0.4 |                    |                  |    |
|                 | Furaltadone          | 139-91-3   | 324.289 | -0.8 |                    |                  | R  |
|                 | Furazolidone         | 67-45-8    | 225.158 | -0.5 |                    |                  | /  |
|                 | Nifustyrenate Sodium | 54992-23-3 | 281.196 | /    |                    |                  | /  |
|                 | Difurazone           | 804-36-4   | 360.282 | 2.6  |                    |                  | /  |
| Nitroimidazoles | Tinidazole           | 19387-91-8 | 247.272 | -0.3 | /                  | F                | /  |
|                 | Ronidazole           | 7681-76-7  | 200.152 | -0.5 |                    |                  |    |
|                 | Dimetridazole        | 551-92-8   | 141.128 | 0.3  | F                  | ND               | R  |
|                 | Metronidazole        | 443-48-1   | 171.154 | 0.0  |                    |                  |    |
|                 | Ipronidazole         | 14885-29-1 | 169.181 | 1.2  | /                  | /                |    |

|        |                 |          |         |     |                  |    |   |
|--------|-----------------|----------|---------|-----|------------------|----|---|
| Others | Malachite green | 569-64-2 | 364.911 | 5.0 | F,2 <sup>a</sup> | F  | R |
|        | trimethoprim    | 738-70-5 | 290.318 | 0.4 | 50               | 50 | / |

<sup>a</sup> MPRL set for poultry meat and aquaculture products.

/: Related information was not available.

F: Forbidden.

ND: Not detected.

R: Risk Management Recommendations.

<sup>†</sup> Total residue.

Molecular weight and Log P are Obtained from "http://www.chemspider.com/".

**Table S2.** Standard methods for the detection of antibiotics in aquaculture products in China

| Number | Document                                                    | Classes Of Antibiotics | Matrix                                              | Detection method |                                   | LOQ ( $\mu\text{g}\cdot\text{kg}^{-1}$ ) |
|--------|-------------------------------------------------------------|------------------------|-----------------------------------------------------|------------------|-----------------------------------|------------------------------------------|
| 1      | GB 29682-2013                                               | Penicillins            | aquaculture products                                | HPLC-UV          |                                   | 10-50                                    |
| 2      | GB/T 20756-2006                                             | Amphenicols            | Animal muscle and liver, aquaculture products       | LC-MS/MS         | CAP: 0.1(LOD), Others: 1.0(LOD)   |                                          |
| 3      | GB/T 22338-2008                                             | Amphenicols            | aquaculture product, poultry                        | LC-MS/MS         |                                   | 0.1                                      |
| 4      | GB/T 21316-2007                                             | Sulfonamides           | Animal muscle and liver, aquaculture products, milk | LC-MS/MS         | Aquaculture: 10, other mateix: 50 |                                          |
| 5      | GB 29702-2013                                               | Trimethoprim           | aquaculture products                                | HPLC-UV          |                                   | 20                                       |
| 6      | GB/T 20366-2006                                             | Quinolones             | Fish, shrimp, birds, rabbits                        | LC-MS/MS         |                                   | 1                                        |
| 7      | GB 31660.1-2019                                             | Macrolides             | aquaculture products                                | LC-MS/MS         |                                   | 2-4                                      |
| 8      | GB 29684-2013                                               | Erythromycin           | aquaculture products                                | LC-MS/MS         |                                   | 1                                        |
| 9      | Announcement No. 783 of the Ministry of agriculture-1-2006  | Nitrofurans            | aquaculture products                                | LC-MS/MS         |                                   | 0.5                                      |
| 10     | Announcement No. 1077 of the Ministry of agriculture-2-2008 | Nitrofurans            | aquaculture products                                | HPLC-UV          |                                   | 1                                        |
| 11     | GB/T 20752-2006                                             | Nitrofurans            | Pork and liver, beef, chicken, aquaculture products | LC-MS/MS         |                                   | 0.5 (LOD)                                |

|    |                 |                      |                                                           |                     |          |
|----|-----------------|----------------------|-----------------------------------------------------------|---------------------|----------|
| 12 | GB/T 21311-2007 | Nitrofurans          | Muscle, liver, fish,<br>shrimp, eggs, milk,<br>honey      | LC-MS/MS            | 0.5      |
| 13 | GB/T 21317-2007 | Tetracyclines        | Animal muscle and<br>liver, aquaculture<br>products, milk | LC-MS/MS<br>HPLC-UV | 50<br>50 |
| 14 | GB/T 22961-2008 | Tetracyclines        | swellfish, eel                                            | HPLC-UV             | 10 (LOD) |
| 15 | GB/T 21318-2007 | Nitroimidazoles      | Animal Derived Food<br>(including fish)                   | LC-MS/MS            | 0.5-1    |
| 16 | GB/T 21314-2007 | Cephapirin、ceftiofur | Animal Derived Food                                       | LC-MS/MS            | 1、 50    |
| 17 | GB/T 21323-2007 | Aminoglycosides      | Animal muscle and<br>liver, aquaculture<br>products       | LC-MS/MS            | 20-100   |

**Table S3.** Matrix certified reference materials for antibiotic in different countries

| Country | Matrix                      | Compounds               | Serial number   | standard values                        | uncertainty (k=2) |
|---------|-----------------------------|-------------------------|-----------------|----------------------------------------|-------------------|
| China   | Eel muscle (Dried powder)   | 3-amino-2-oxazolidinone | GBW(E)100180    | 3.67 $\mu\text{g}\cdot\text{kg}^{-1}$  | 0.56              |
|         |                             |                         | GBW(E)100531    | 7.0 $\mu\text{g}\cdot\text{kg}^{-1}$   | 1                 |
|         |                             |                         | GBW(E)100532    | 17.6 $\mu\text{g}\cdot\text{kg}^{-1}$  | 2.2               |
|         | Fish meat (Dried powder)    | Chloramphenicol         | GBW10137        | 0.59 $\mu\text{g}\cdot\text{kg}^{-1}$  | 0.07              |
|         |                             |                         | GBW(E)100365    | 0.60 $\mu\text{g}\cdot\text{kg}^{-1}$  | 0.05              |
|         |                             |                         | GBW(E)100072    | 11.8 $\mu\text{g}\cdot\text{kg}^{-1}$  | 26%               |
|         |                             | Enrofloxacin            | GBW10167        | 62.5 $\mu\text{g}\cdot\text{kg}^{-1}$  | 6.3               |
|         |                             | Norfloxacin             | GBW10168        | 41.80 $\mu\text{g}\cdot\text{kg}^{-1}$ | 5.9               |
|         | Chicken meat (Dried powder) | Enrofloxacin            | GBW10152        | 0.38 $\text{mg}\cdot\text{kg}^{-1}$    | 0.053             |
|         |                             | Ciprofloxacin           | GBW10153        | 0.456 $\text{mg}\cdot\text{kg}^{-1}$   | 0.055             |
|         | milk powder                 | Chloramphenicol         | GBW10085        | 0.9 $\mu\text{g}\cdot\text{kg}^{-1}$   | 0.07              |
|         | honey                       | Chloramphenicol         | GBW(E)100569    | 0.7 $\mu\text{g}\cdot\text{kg}^{-1}$   | 0.2               |
|         |                             | Norfloxacin             | GBW(E)100563    | 31.70 $\mu\text{g}\cdot\text{kg}^{-1}$ | 3.9               |
|         |                             | Ofloxacin               | GBW(E)100564    | 22.2 $\mu\text{g}\cdot\text{kg}^{-1}$  | 3.1               |
|         |                             | Danofloxacin            | GBW(E)100570    | 27.2 $\mu\text{g}\cdot\text{kg}^{-1}$  | 5.1               |
|         |                             | Enrofloxacin            | GBW(E)100571    | 23.60 $\mu\text{g}\cdot\text{kg}^{-1}$ | 5                 |
|         |                             | Ciprofloxacin           | GBW(E)100572    | 17.6 $\mu\text{g}\cdot\text{kg}^{-1}$  | 3.9               |
|         |                             | Norfloxacin             | GBW10180 (high) | 6.7 $\mu\text{g}\cdot\text{kg}^{-1}$   | 0.8               |
|         |                             | Ciprofloxacin           |                 |                                        |                   |
|         |                             | sulfadiazine            |                 | 89.7 $\mu\text{g}\cdot\text{kg}^{-1}$  | 6.3               |
|         |                             | sulfapyridine           |                 | 96.7 $\mu\text{g}\cdot\text{kg}^{-1}$  | 7.2               |
|         |                             | sulfamerazine           |                 | 85.2 $\mu\text{g}\cdot\text{kg}^{-1}$  | 6.2               |
|         |                             | sulfadimidine           |                 | 97.2 $\mu\text{g}\cdot\text{kg}^{-1}$  | 6.8               |

|             |                             |                                       |                    |                                        |       |
|-------------|-----------------------------|---------------------------------------|--------------------|----------------------------------------|-------|
| Canada      | Egg                         | sulfadiazine                          | GBW10181 (low)     | 20.8 $\mu\text{g}\cdot\text{kg}^{-1}$  | 2.4   |
|             |                             | sulfapyridine                         |                    | 22.1 $\mu\text{g}\cdot\text{kg}^{-1}$  | 2.3   |
|             |                             | sulfamerazine                         |                    | 19.7 $\mu\text{g}\cdot\text{kg}^{-1}$  | 2.8   |
|             |                             | sulfadimidine                         |                    | 22.6 $\mu\text{g}\cdot\text{kg}^{-1}$  |       |
|             |                             | sulfamethoxazole                      | GBW(E)100499       | 20.6 $\mu\text{g}\cdot\text{kg}^{-1}$  | 3.1   |
|             |                             | metronidazole                         | GBW(E)100568       | 13.7 $\mu\text{g}\cdot\text{kg}^{-1}$  | 1.7   |
|             |                             | Enrofloxacin                          | GBW10150           | 30.6 $\mu\text{g}\cdot\text{kg}^{-1}$  | 3.1   |
|             |                             | Ciprofloxacin                         | GBW10151           | 39.7 $\mu\text{g}\cdot\text{kg}^{-1}$  | 5.2   |
|             |                             | Veterinary drug residues <sup>a</sup> | A33-11-02-BOTS     | \                                      | \     |
|             |                             |                                       |                    |                                        |       |
| Australia   | Freeze-Dried Prawn          | 3-amino-2-oxazolidinone               | MX012A             | 30.2 $\mu\text{g}\cdot\text{kg}^{-1}$  | 1.8   |
|             |                             | semicarbazide                         |                    | 70.3 $\mu\text{g}\cdot\text{kg}^{-1}$  | 3.1   |
|             |                             | 3-amino-2-oxazolidinone               | MXB12B             | 137.5 $\mu\text{g}\cdot\text{kg}^{-1}$ | 8.5   |
| South Korea | Chicken meat (Dried powder) | enrofloxacin                          | 108-03-003(130708) | 19.06 $\text{mg}\cdot\text{kg}^{-1}$   | 0.86  |
|             |                             | ciprofloxacin                         | 108-03-004(130715) | 0.981 $\text{mg}\cdot\text{kg}^{-1}$   | 0.072 |

<sup>a</sup> includes chlorpromazine, ciprofloxacin, clenbuterol, dexamethasone, enrofloxacin, meloxicam, ractopamine, sulfadiazine.

\: Related information was not available.
